## The role of A $\beta$ circRNA in Alzheimer's disease: alternative mechanism of A $\beta$ biogenesis from A $\beta$ circRNA translation

Dingding Mo<sup>#,\*</sup>, Di Cui<sup>#</sup>, Xinping Li<sup>#</sup>

<sup>#</sup>, Max Planck Institute for Biology of Ageing, Joseph-Stelzmann-Strasse 9b, 50931 Cologne, Germany

<sup>\*</sup>, Corresponding author, [Dingding.Mo@age.mpg.de](mailto:Dingding.Mo@age.mpg.de)

### Abstract:

CircRNAs enrich in neurons and accumulate during brain ageing, indicating possible roles in age-associated neurodegenerative diseases.

Alzheimer's disease (AD) is the most common detrimental dementia. Studies show amyloid- $\beta$  (A $\beta$ ) peptide plays key role in AD. A $\beta$  could accumulate from the full-length APP proteolytic processing, especially in familial AD, but the mechanism of A $\beta$  biogenesis in sporadic AD remains largely unknown.

Here, we demonstrate that a couple of circRNAs are expressed from APP gene, encompassing the A $\beta$  sequence. They are named as A $\beta$  circRNAs. Using circRNA expression strategy based on intron mediated enhancement (IME), we found A $\beta$  circRNA encoded A $\beta$  related peptide. Importantly, this peptide is further processed to produce A $\beta$ , thus representing an alternative mechanism of A $\beta$  biogenesis.

Furthermore, A $\beta$  circRNA up-regulates GSK3 $\beta$  levels and tau phosphorylation, both hallmarks of AD. Thus, A $\beta$  circRNA and translated peptides may not only play a causative role in AD but represent promising therapeutic targets in the AD medicine.

**Key words:** Neurodegeneration, Alzheimer's disease (AD), Circular RNA (circRNA), intron-mediated enhancement (IME), amyloid beta (A $\beta$ ), amyloid beta (A $\beta$ ) circRNAs, A $\beta$  circRNA derived peptides (A $\beta$ -circRNA-DP), GSK3 $\beta$ , tau phosphorylation.

### Introduction:

Alzheimer's disease (AD) is the most common form of dementia associated with progressive loss of memory, thinking and behaviour capabilities<sup>1-4</sup>. As an ageing-associated neurodegenerative disorder, the greatest known risk factor for AD is increasing age itself<sup>3,5</sup>. Both the leading hypothesis and extensive studies have focused on the causative roles of amyloid- $\beta$  (A $\beta$ ) peptide accumulation and tau hyperphosphorylation<sup>1-4,6-9</sup>. It has been shown that mutations in genes (APP, Presenilin) participating in APP protein proteolytic processing accelerate the accumulation of A $\beta$  peptides (A $\beta$  36-43). These peptides polymerize into toxic forms, aggregate into insoluble amyloid plaques, and lead to tau protein hyperphosphorylation through GSK3 $\beta$  activation, and subsequently neurofibrillary tangles forming inside neurons, triggering a cascade of events that ultimately cause neuron death<sup>1,2,10-14</sup>. This type of Alzheimer's disease is normally called familial Alzheimer's disease (FAD). Since it develops at an earlier age, it is also described as early-onset familial Alzheimer's disease (eFAD).

Despite well-demonstrated roles of genetic mutations in FAD, this type of AD accounts for less than 1-5% of all AD patients<sup>15,16</sup>. The most common form of AD is late-onset Alzheimer's (LOAD), which normally arises in people aged 65 and older. This type of AD is sporadic, correspondingly it is also called sporadic AD (SAD); the direct cause or genes responsible for LOAD/SAD are largely unknown.

Although with different age of onset and genetic causes, both FAD and SAD are believed to share a similar overall sequence of symptoms and gradually increasing impairments. The

pathologic hallmarks of both FAD and SAD are plaques and tangles arising from A $\beta$  accumulation and tau hyperphosphorylation. The sporadic incidence of LOAD poses the question of what the exact mechanism of AD is<sup>17,18</sup>. Moreover, how A $\beta$  accumulates in LOAD/SAD is still largely unknown<sup>2,18-20</sup>.

Circular RNAs (circRNAs) are a form of evolutionary conserved transcripts with a covalently jointed 5' and 3' structure derived from pre-mRNA back-splicing<sup>21</sup>. Previous studies have found that they are especially enriched in neurons<sup>22</sup>. Interestingly, brain circRNAs are regulated during ageing in *C. elegans*, fly and mouse, highlighting potential roles of circRNA in brain ageing and ageing-associated neurodegenerative diseases<sup>23-25</sup>.

In this study, we found that a couple circRNAs from the human APP gene are well expressed in the human brain. Since this circRNAs contains the A $\beta$  coding sequence, here we call it A $\beta$  circRNAs. Using our previously established method of intron-mediated enhancement (IME) of circRNA expression and translation (BioRxiv: <https://doi.org/10.1101/257105>), we shown that one of A $\beta$  circRNA copies clearly expressed A $\beta$  related peptide, which could be further proceeded to generate A $\beta$ , thus indicating a new direction in the mechanism of Alzheimer's disease.

## **Material and methods:**

### **Plasmid construction**

The genetic information about circRNAs from the human APP gene were reported by several groups<sup>22,26-28</sup>. One isoform of circRNA from the APP gene, hsa\_circ\_0007556 (circBase), was called human A $\beta$  circRNA-a for the purpose of this study. The cDNA of human APP circRNA-a (GRCh37/hg19, chr21:27264033-27284274) was inserted into pCircRNA-BE or pCircRNA-DMo vectors to generate pCircRNA-BE-A $\beta$ -a or pCircRNA-DMo-A $\beta$ -a as described previously (BioRxiv: <https://doi.org/10.1101/257105>). Plasmid DNAs were purified with EndoFree Plasmid Maxi Kit (QIAGEN). Details of oligonucleotides are provided in Supplementary Table 1.

### **Cell culture and plasmid DNA transfection**

Human HEK293 and mouse neuro 2a (N2a) cell line cultures and plasmid DNA transfections were performed as previously described (BioRxiv: <https://doi.org/10.1101/257105>). Briefly, 2.5  $\mu$ g of plasmid DNA was transfected into 0.5 million cells for three to six days.

### **Total RNA isolation and qRT-PCR**

Total RNA from HEK293 or N2a cells was isolated with TRIzol reagent (Ambion). Human brain frontal lobe and hippocampus total RNAs were purchased from BioCat GmbH. cDNA synthesis and qRT-PCR were performed as previously described (BioRxiv: <https://doi.org/10.1101/257105>). Details of qRT-PCR oligonucleotides are provided in Supplementary Table 1.

### **A $\beta$ circRNAs identification by RT-PCR and sequencing**

All A $\beta$  containing circRNA from APP gene were RT-PCR amplified by specific divergent primers targeted at the exon 17 of APP gene from human brain frontal lobe and hippocampus total RNAs. For RNase R treatment, 15  $\mu$ g total RNAs were digested with RNase R for 1 hour at 37 °C and purified by phenol-chloroform purification. PCR products were digested by BamHI and XhoI, then ligated to pCMV-MIR vector.

PCR primers: AB-cRNA $\nu$ BF2, atatagatccGTGATCGTCATCACCTTGGTGATGC  
AB-cRNA $\nu$ XR2, tatatctcagCACCATGAGTCCAATGATTGCACC

## Northern blot analysis

Northern blot analysis was performed similarly as previous described<sup>29</sup>. In brief, total RNAs from HEK293 cells were separated on 5% polyacrylamide gel (Bio-Rad) and transferred to positively charged nylon membrane, then blot was hybridized with 5' p<sup>32</sup> labeled DNA oligo overnight (A $\beta$ -NBR1: CCCACCATGAGTCCAATGATTGCACCTTTGTTTGAACCCACATCTTCTGCAAAGAACACC). For RNase R treatment, 15  $\mu$ g total RNAs were digested with 10 units of RNase R (RNR07250, Epicentre) for 1 hour at 37 °C and then the treated RNAs were directly separated on gel and analysed by northern blot.

## Western blot assays

Total proteins were prepared in RIPA buffer as previously described (BioRxiv: <https://doi.org/10.1101/257105>). For detecting A $\beta$  circRNA-a-derived peptide in N2a cells, the PIPA buffer-insoluble proteins were extracted by 70% formic acid as described previously<sup>30</sup>. Protein extractions were separated on 18% or 4-20% Criterion™ TGX Stain-Free™ Protein Gel (Bio-Rad) and transferred to 0.2  $\mu$ m nitrocellulose membranes, then immunoblotted against  $\beta$ -amyloid ( $\beta$ -Amyloid (D54D2) XP® Rabbit mAb #8243, Cell signalling Technology, which also recognizes APP full-length protein), GSK3 $\beta$  (#12456, Cell signalling Technology), tau (#MN1000, Thermo Scientific), phospho-tau (AT8, #MN1020; AT100, #MN1060; ThermoFisher Scientific) and  $\beta$ -Actin (#A5441, Sigma). Quantitative analyses were performed with ImageJ (NIH). A $\beta$ 42 (A9810, Sigma) was prepared in DMSO.

## Immunoprecipitation/western blotting of A $\beta$ and A $\beta$ related peptides (IP-WB, IP-MS)

A $\beta$  and A $\beta$  related peptides detection was performed through immunoprecipitation of conditioned medium (CM) and HEK293 cell extract in RIPA buffer, followed with western blot analysis as previous described<sup>31</sup>. In brief, HEK293 cells transfected with, pCircRNA-BE-A $\beta$ -a, pCircRNA-DMo-A $\beta$ -a or empty vector control (pCircRNA-DMo) were cultured in serum free medium overnight. Then CM/cell extract was prepared with protease and phosphatase inhibitor (Roche) and precleaned with Protein A/G. Immunoprecipitation was performed with mixture of A $\beta$  antibodies (6E10, 6G8, BioLegend Inc.). Precipitated peptides were resolved in SDS loading buffer and analysed by western blot with antibody against A $\beta$  (D54D2).

## Results

### A $\beta$ circRNA isoforms expression from the APP gene in human brain

Previous deep-sequencing studies have discovered several candidate circRNAs from human APP gene, and one candidate circRNA (hsa\_circ\_0007556, circBase) contains the A $\beta$  sequence<sup>22,26-28</sup>. To identify all possible circRNAs encoding A $\beta$  peptide sequence from APP gene, we performed RT-PCR with specifically designed divergent primers to detect A $\beta$  sequence containing circRNA copies in the total RNA of human brain samples (Fig. 1). The amplified RT-PCR products were ligated to pCMV-MIR vector and the resulted constructs were sequenced. As shown in Fig. 1, 14 circRNAs isoforms were identified and hsa\_circ\_0007556 was confirmed in this list (the junction sites were shown in Supplementary Fig. 1). Since these circRNAs include the sequence of the A $\beta$  peptide, in this study they are called A $\beta$  circRNA (Fig. 1B). Individually, hsa\_circ\_0007556 is named as A $\beta$  circRNA-a (Fig. 1B).

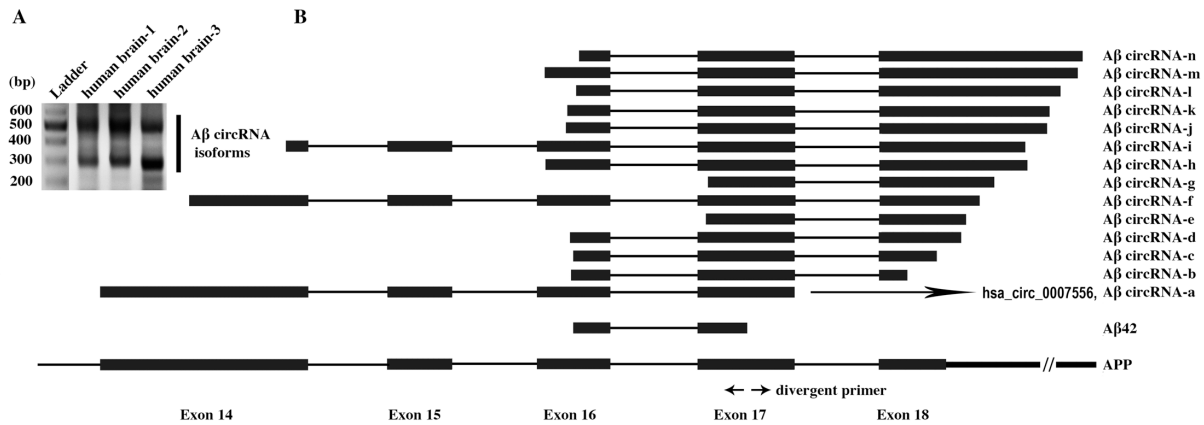

**Fig. 1: A $\beta$  circRNA isoforms identification from the APP gene in human brain**

A) agarose gel electrophoresis of A $\beta$  circRNA RT-PCR products with divergent primers located in the exon 17 of human APP gene in human brain samples. Three human brain samples were used. The amplified products were ligated to vector and the resulted constructs were sequenced and aligned (results were shown in B).

B) the localizations of A $\beta$  circRNA isoforms in APP gene. A $\beta$ 42 sequence was used as location reference. A $\beta$  circRNA isoforms were named as A $\beta$  circRNA-a, b, c, d, e, f, g, h, i, j, k, l, m, n. The short arrow indicates the location of divergent primer. The long arrow indicates hsa\_circ\_0007556 circRNA, which is named as A $\beta$  circRNA-a in this study. The original sequencing results were provided in Supplementary sequencing data.

### IME promotes A $\beta$ circRNA-a overexpression in cell lines

To further confirm A $\beta$  circRNA-a's existence in human brain, we performed RT-PCR on human frontal lobe and hippocampus total RNA using oligonucleotides specifically designed to detect A $\beta$  circRNA-a (Fig. 2A, C). Indeed, A $\beta$  circRNA-a was clearly well expressed in human frontal lobe and hippocampus (Fig. 2A, C).

To facilitate circRNA functional studies, we recently developed an intron-mediated enhancement (IME) strategy for robust circRNA expression (BioRxiv: <https://doi.org/10.1101/257105>). Here, we applied this method to boost A $\beta$  circRNA-a expression from vectors constructed in a similar manner to the described strategy (Fig. 2A, B) (BioRxiv: <https://doi.org/10.1101/257105>). Transient expression in HEK293 cells showed that pCircRNA-BE-A $\beta$ -a and pCircRNA-DMo-A $\beta$ -a generated 2185- and 3268-fold more A $\beta$  circRNA-a than was endogenously produced in HEK293 cells transfected with empty vector (Fig. 2C, D). RT-PCR confirmed that the overexpressed A $\beta$  circRNA-a was spliced exactly as the wildtype A $\beta$  circRNA-a (Supplementary Fig. 2). Sequencing the RT-PCR products further confirmed that their sequences were identical to wild type A $\beta$  circRNA-a found in the human brain (Supplementary Fig. 2C, D). Moreover, we used northern blot to detect A $\beta$  circRNA-a expression. As shown in Supplementary Fig. 2E, the detected A $\beta$  circRNA-a migrated faster than the linear counterpart in native agarose gel. RNase R treatment abolished the linear counterpart but the suggested A $\beta$  circRNA-a bands were not affected, demonstrating the circularity of the expressed A $\beta$  circRNA-a in HEK293 cell (Supplementary Fig. 2E).

Since HEK293 is a well-established cell line for Alzheimer's disease research<sup>32,33</sup>, the robust IME strategy for transient expression of A $\beta$  circRNA-a in HEK293 cells provides a good model for studying A $\beta$  circRNA-a function. In the endogenous control, qRT-PCR showed that the level of human full-length APP mRNA was not changed (Supplementary Fig. 4), indicating that endogenous APP gene expression was not affected.

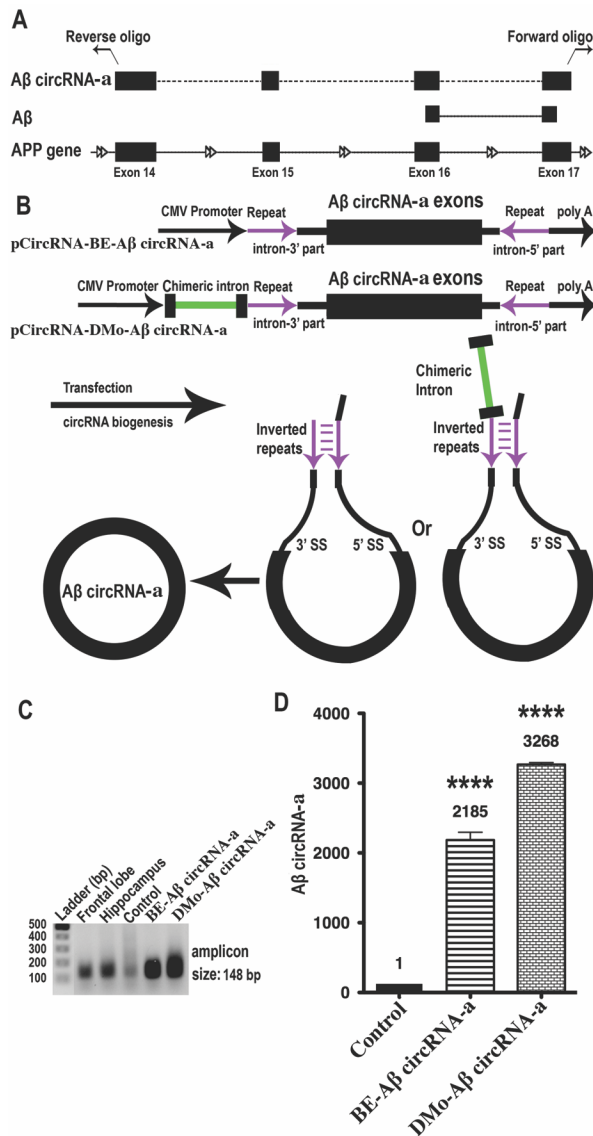

**Fig. 2: Aβ circRNA-a overexpressing HEK293 cells.**

A) Aβ circRNA-a is encoded by exons 14-17 of the human APP gene, without the introns. The amyloid-β (Aβ) sequence is located in exons 16 and 17. Reverse and forward oligonucleotides were used to amplify Aβ circRNA-a by RT-PCR. B) Aβ circRNA-a over-expression constructs. C) RT-PCR verification of Aβ circRNA-a expression in human brain samples (frontal lobe and hippocampus) and HEK293 cells overexpressing Aβ circRNA-a; Control, pCircRNA-DMo empty vector transfection into HEK293; BE-Aβ circRNA-a, pCircRNA-BE-Aβ-a transfection into HEK293; DMo-Aβ circRNA-a, pCircRNA-DMo-Aβ-a transfection into HEK293; RT-PCR verification of Aβ circRNA-a by another set of oligonucleotides is shown in Supplementary Fig. 2. A, B, C, D) Aβ circRNA-a expression in HEK293 cells mediated by pCircRNA-BE circRNA-a and pCircRNA-DMo circRNA-a vectors. Control, empty vector (pCircRNA-DMo); BE-Aβ circRNA-a, pCircRNA-BE-Aβ-a; DMo-Aβ circRNA-a, pCircRNA-DMo-Aβ-a. All statistical T tests were performed in comparison to the control sample, \*\*\*\*,  $P \leq 0.0001$ ,  $n = 4$ .

### Aβ circRNA-a can be translated into an Aβ related peptide

Previous studies have shown that certain circRNAs are translatable<sup>34-37</sup>(BioRxiv: <https://doi.org/10.1101/257105>). Examination of the Aβ circRNA-a revealed that it contained an open reading frame (ORF) (Fig. 3A) that would translate into a putative protein with a calculated molecular weight of 19.2 kDa (Supplementary Fig. 5). Western blots to detect

whether an A $\beta$  related peptide was translated in HEK293 cells overexpressing A $\beta$  circRNA-a used an antibody ( $\beta$ -Amyloid (D54D2) XP<sup>®</sup> Rabbit mAb) that detected all A $\beta$  containing peptides. Specifically, we detected an obvious A $\beta$ -related peptide signal with a size around 15 to 20 kDa, confirming the translation of A $\beta$  circRNA-a (Fig. 3B). Products of A $\beta$  circRNA-a translation were called A $\beta$  circRNA-a-derived peptide (A $\beta$  circRNA-a-DP).

Interestingly, control HEK293 cells transfected with empty vector contained detectable amounts of A $\beta$  circRNA-a-DP. As we showed above (Fig. 2), HEK293 cells expressed low levels of endogenous A $\beta$  circRNA-a, thus detectable A $\beta$  circRNA-a-DP in control HEK293 cells represents its endogenous translation. Importantly, such detectable A $\beta$  circRNA-a-DP in HEK293 cells confirmed its authenticity, highlighting its biological relevance.

Clearly, as in our previous study (BioRxiv: <https://doi.org/10.1101/257105>), intron-mediated enhancement (IME) increased A $\beta$  circRNA-a translation. pCircRNA-DMo-A $\beta$ -a expressed about 3.3-fold more A $\beta$  circRNA-a-DP than the endogenous expression in HEK293 cells, while pCircRNA-BE-A $\beta$ -a only moderately enhanced A $\beta$  circRNA-a-DP levels (1.4-fold; Fig 3B, C). Interestingly, the enrichment of protein product (A $\beta$  circRNA-a-DP) was much less significant than the elevated expression of A $\beta$  circRNA-a, indicating that the translation of A $\beta$  circRNA-a was regulated by other unknown mechanisms.

Next, we used a mouse neuroblastoma cell line to further validate the transcription and translation of A $\beta$  circRNA-a. These N2a cells apparently do not express any detectable A $\beta$  circRNA-a or translation product (Fig 3D, F). However, pCircRNA-DMo-A $\beta$  expressed 4.6-fold more A $\beta$  circRNA-a than pCircRNA-BE-A $\beta$ , whereas the internal control, App mRNA, showed no change (Fig 3D, F). In both A $\beta$  circRNA-a overexpressing N2a cells, A $\beta$  circRNA-a-DP was well expressed, and consistent with HEK293 cells, IME dramatically enhanced A $\beta$  circRNA-a-DP expression (Fig 3D, F). Since N2a cells do not express A $\beta$  circRNA-a-DP or related peptides endogenously, the detection of A $\beta$  related peptide at 15-20 kDa further clearly confirmed that A $\beta$  circRNA-a was the template for translating A $\beta$  circRNA-a-DP. As internal control, the endogenous App mRNA in N2a cell was not changed (Fig 3E).

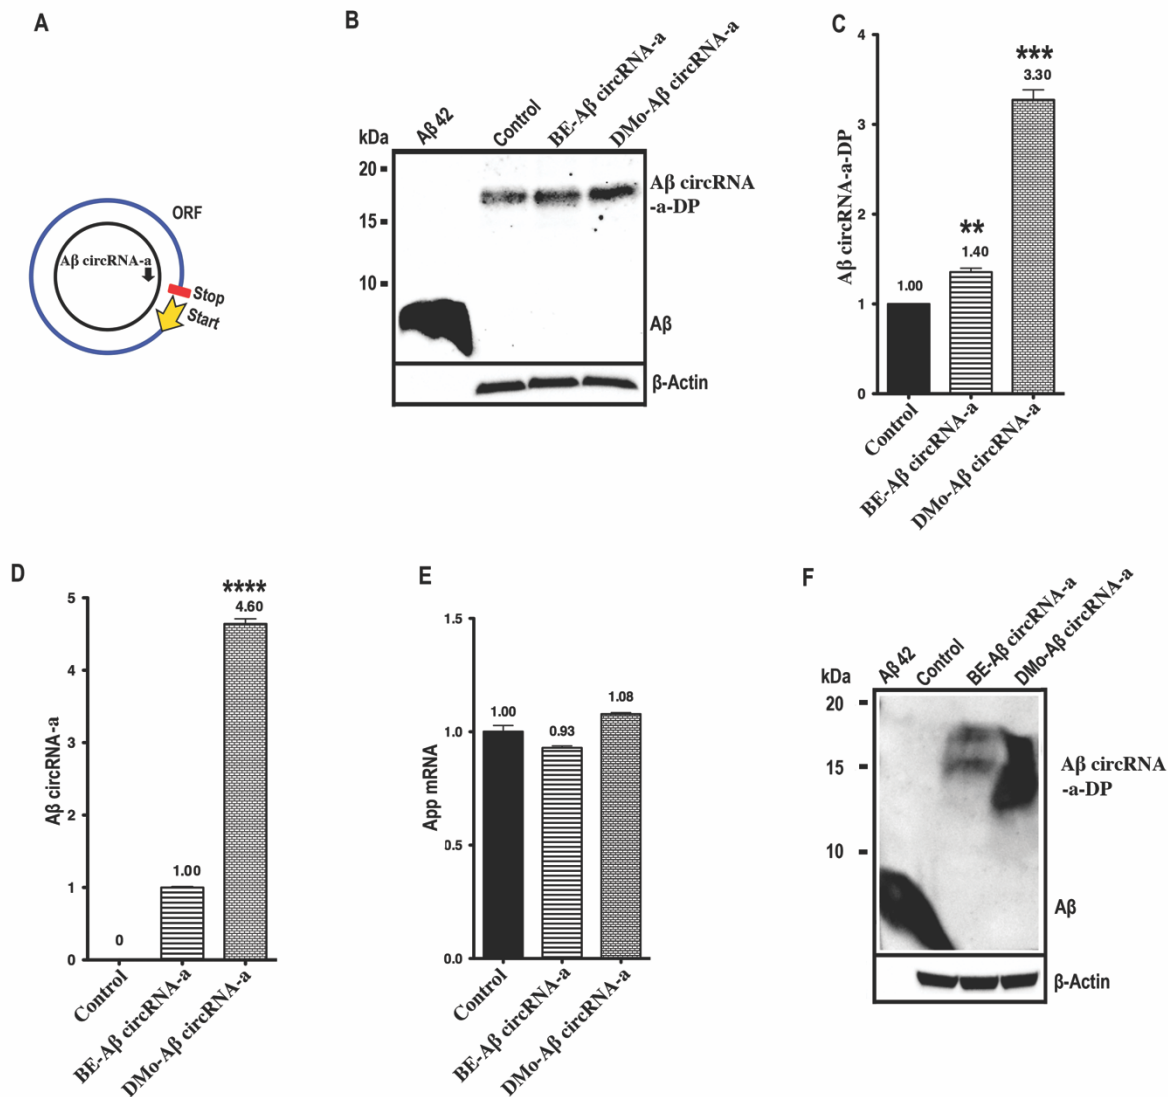

**Fig. 3: Expression of Aβ related peptide from Aβ circRNA-a translation in HEK293 and N2a cells.**

A) The open reading frame (ORF) of Aβ circRNA-a is represented by a blue circle; yellow arrow, translation start codon; red square, stop codon; the inner black arrow shows the start of the Aβ circRNA-a. B) Western blot of Aβ-related peptides in HEK293 cells. 5 ng of *in vitro* synthesized Aβ42 was used as a positive control peptide and migration indicator. Control, empty vector (pCircRNA-DMo); BE-Aβ circRNA-a, pCircRNA-BE-Aβ circRNA-a; DMo-Aβ circRNA-a, pCircRNA-DMo-Aβ circRNA-a. The detected peptides indicated on the right: Aβ circRNA-a-DP, Aβ circRNA-a-derived protein; Aβ, synthetic peptide Aβ42; β-Actin used as a loading control. C) quantification of Aβ circRNA-a-DP levels.)

D) Aβ circRNA-a expression in N2a cells. Control, empty vector (pCircRNA-DMo); BE-Aβ circRNA-a, pCircRNA-BE-Aβ circRNA-a; DMo-Aβ circRNA-a, pCircRNA-DMo-Aβ circRNA-a. E) Mouse App mRNA expression in Aβ circRNA-a overexpressing N2a cells. F) Western blot of Aβ related peptides in Aβ circRNA-a overexpressing N2a cells. The synthetic Aβ42 peptide (Fig. 3) was used as a positive detection and migration control; Control, empty vector (pCircRNA-DMo); BE-Aβ circRNA-a, pCircRNA-BE-Aβ circRNA-a; DMo-Aβ circRNA-a, pCircRNA-DMo-Aβ circRNA-a. Panels C, D, all statistical T tests were performed with respect to the control sample; \*\*,  $P \leq 0.01$ ; \*\*\*,  $P \leq 0.001$ ;  $n \geq 3$ . Panel D, E, all statistical T tests were performed in comparison to the control sample (in panel E this was BE-Aβ circRNA-a set at 1); \*\*\*\*,  $P \leq 0.0001$ ;  $n = 3$ .

### A $\beta$ circRNA-a derived peptide is further processed to form A $\beta$ .

To further investigate the protein sequence of A $\beta$  circRNA-a derived peptides, we use two specific A $\beta$  antibodies (6E10, 4G8) to immunoprecipitate these peptides from RIPA buffer extract of HEK 293 cell with A $\beta$  circRNA-a overexpression. As shown in Fig. 4A, western blot analysis of these isolated peptides with another A $\beta$  antibody (D54D2) confirmed that they could be specifically immunoprecipitated, further demonstrating the expressed peptides contain A $\beta$  peptide sequence. Importantly, the expression level of A $\beta$  related peptides in the IP output of the three samples (control, pCircRNA-BE-A $\beta$ -a, pCircRNA-DMo-A $\beta$ -a) is consistent with their input levels, demonstrating that the IP manipulation does not changed the relative quantities of the A $\beta$  related peptides in these different samples.

The production of A $\beta$  related peptide from A $\beta$  circRNA-a translation highlights the potential of A $\beta$  biogenesis. Moreover, the predicted protein sequence of A $\beta$  circRNA-a-DP contain  $\beta$  and  $\gamma$ -secretase cleavage site, indicating that A $\beta$  can be produced from A $\beta$  circRNA-a-DP by  $\beta$  and  $\gamma$ -secretase proteolytic processing (Supplementary Fig. 5). So, we used immunoprecipitation/western blotting (IP-WB) by specific A $\beta$  antibodies (6E10, 4G8) to analyse the possible A $\beta$  from the conditioned medium (CM) of A $\beta$  circRNA-a overexpressed HKE293 cells. Strikingly, we detected a peptide band corresponding to A $\beta$  in western blot with another A $\beta$  antibody (D54D2), thus confirming the biogenesis of A $\beta$  from A $\beta$  circRNA-a translation (Fig. 4A, B). Compared to empty vector transfection, pCircRNA-BE-A $\beta$ -a caused 2.6-fold increase of A $\beta$  peptide expression in the condition medium (Fig. 4A, B). Strikingly, pCircRNA-DMo-A $\beta$ -a caused as more as 6-fold increase of A $\beta$  peptide expression (Fig. 4A, B). Of note, the difference trend of A $\beta$  expression level between three samples (control, pCircRNA-BE-A $\beta$ -a, pCircRNA-DMo-A $\beta$ -a) was consistent with the difference trend of A $\beta$  circRNA-a-DP, representing the upregulated A $\beta$  was processed from circRNA-a-DP.

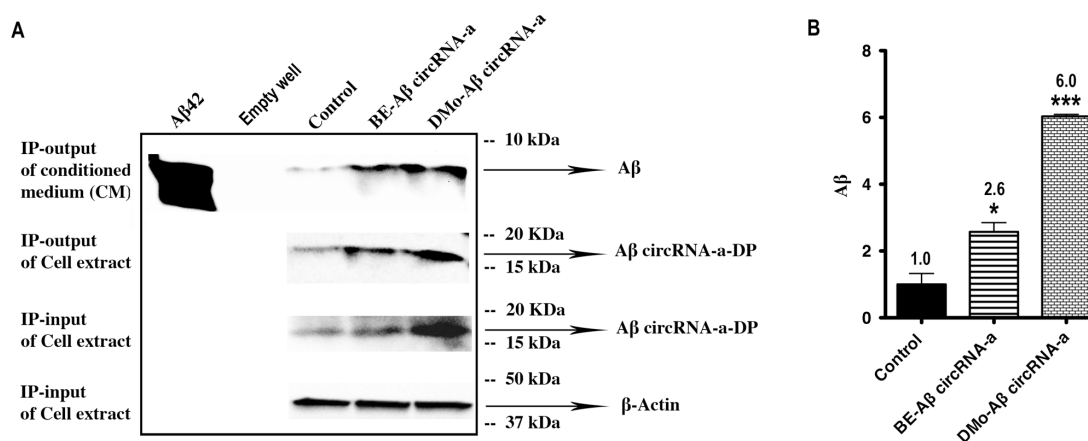

**Fig. 4: IP-WB of A $\beta$  peptides from in the conditioned medium of A $\beta$  circRNA-a overexpressed cells.**

The conditioned medium of HKE293 with transfection of A $\beta$  circRNA-a overexpression vector was immunoprecipitated with antibody against A $\beta$  (6E10, 4G8). Control, pCircRNA-DMo; BE-A $\beta$  circRNA-a, pCircRNA-BE-A $\beta$ -a; DMo-A $\beta$  circRNA-a, pCircRNA-DMo-A $\beta$ -a; transfected HEK 293 cells were lysed in RIPA buffer and A $\beta$  antibodies (6E10, 4G8) were used in immunoprecipitation; A $\beta$  antibody (D54D2) was used in western blot;  $\beta$ -Actin was used as loading control. 5 ng in vitro synthesised A $\beta$ 42 was used as A $\beta$  migration maker in western blot. All statistical T tests were performed in comparison to the control sample; \*,  $P \leq 0.05$ ; \*\*\*,  $P \leq 0.001$ ;  $n = 3$ .

### A $\beta$ circRNA-a overexpression significantly up-regulates GSK3 $\beta$ and tau phosphorylation



Previously studies have shown that A $\beta$  peptides are toxic to neural cells and cause GSK3 $\beta$  activation, which promotes the phosphorylation of tau proteins. To evaluate the potential roles of A $\beta$  circRNA-a translated peptides, especially the generated A $\beta$  peptides, we analysed GSK3 $\beta$  levels and the phosphorylation of tau proteins in HEK293 cells overexpressing A $\beta$  circRNA-a using western blots. Indeed, A $\beta$  circRNA-a overexpression significantly increased GSK3 $\beta$  levels, by 2.3-fold following pCircRNA-BE-A $\beta$  transfection and 3.5-fold after pCircRNA-DMo-A $\beta$  circRNA-a transfection (Fig. 5A, B). Interestingly, tau protein levels were also upregulated when A $\beta$  circRNA-a was overexpressed (HT7 antibody; Fig. 5A, C). Using AT8 (Ser202, Thr205) and AT100 (Thr212, Ser214) antibodies to analyse tau phosphorylation, pCircRNA-BE-A $\beta$  circRNA-a transfection resulted in a 2.6-fold increase in phosphorylation detected by AT8 and a 2.9-fold increase detected by AT100. Correlating with the IME enhanced higher expression of A $\beta$  circRNA-a-DP, pCircRNA-DMo-A $\beta$  circRNA-a transfected cells contained 3.7-fold or 5.0-fold more phosphorylated tau detected with AT8 or AT100 antibodies (Fig. 5A, C, D, E).

In summary, A $\beta$  circRNA-a significantly up-regulate GSK3 $\beta$  and consequently promote tau phosphorylation.

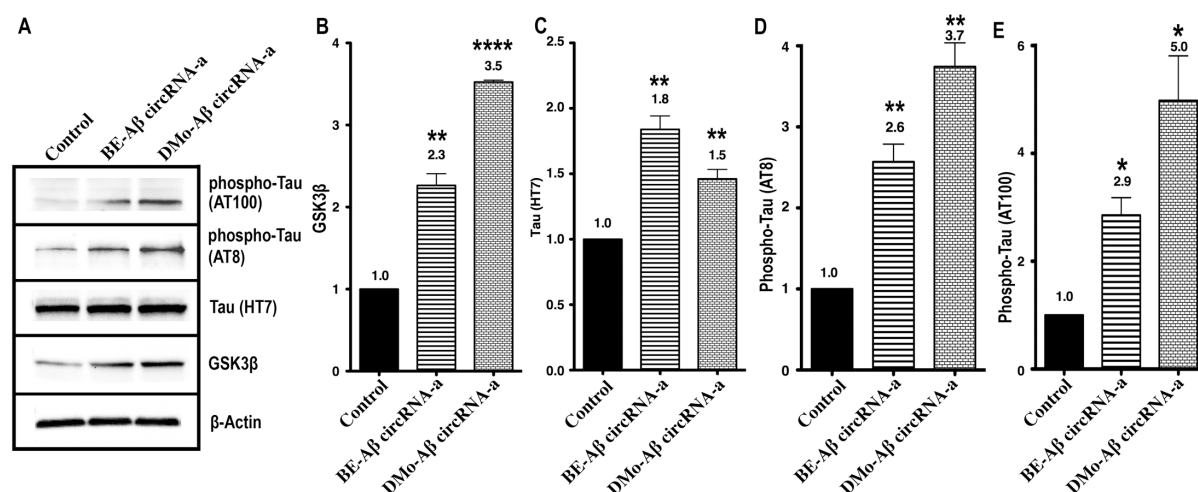

**Fig. 5: A $\beta$  circRNA-a up-regulates GSK3 $\beta$  expression and promotes tau protein phosphorylation.**

A) GSK3 $\beta$  and tau protein (HT7 antibody) levels, and tau phosphorylation detected in HEK293 cells overexpressing A $\beta$  circRNA-a.  $\beta$ -actin was used as a loading control. Control, pCircRNA-DMo empty vector; BE-A $\beta$  circRNA-a, pCircRNA-BE-A $\beta$ -a; DMo-A $\beta$  circRNA-a, pCircRNA-DMo-A $\beta$ -a. B) Quantification of GSK3 $\beta$  levels; C) quantification of tau levels; D) quantification of tau phosphorylation levels detected by antibody AT8; E) quantification of tau phosphorylation detected by antibody AT100. All statistical T tests were performed with respect to the control sample; \*\*,  $P \leq 0.01$ ; \*\*\*\*,  $P \leq 0.0001$ ;  $n \geq 3$ .

## Discussion

Although extensive studies have illustrated the biogenesis mechanism of A $\beta$  peptide in FAD, the pathways of A $\beta$  peptide production in SAD remain elusive.

In this study, we discovered a couple of A $\beta$  circRNAs from APP gene. With the help of intron-mediated enhancement of circRNA expression, we could verify that A $\beta$  circRNA-a can be translated into A $\beta$  related peptide and subsequently processed to form A $\beta$ , correspondingly inducing GSK3 $\beta$  up-regulation and tau phosphorylation, thus indicating a new direction in the search for molecular mechanisms of Alzheimer' disease (Fig. 6).

Such a mechanism is dramatically different from A $\beta$  accumulation through dysregulation of full length APP prototypic processing. Thus, it provides an alternative pathway of A $\beta$  biogenesis. Unlike factor mutations in familial Alzheimer's disease, no genetic mutation is required for A $\beta$  circRNAs biogenesis. Correspondingly, the entire human population may express A $\beta$  circRNA and A $\beta$  circRNA-DPs, which may play a key role in sporadic Alzheimer's disease.

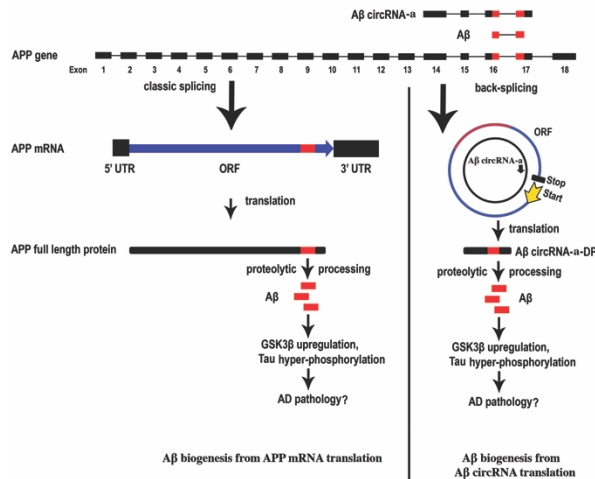

**Fig. 6: Two A $\beta$  biogenesis pathways in Alzheimer's disease.**

At the top, exon sequences contained in A $\beta$  circRNA-a and A $\beta$  peptides (in red) are aligned with the full-length APP gene. On the left, linear APP mRNA transcribed from the APP gene undergoes classic splicing before being translated into full-length APP protein. Proteolytic processing of APP protein generates A $\beta$  peptides (A $\beta$ 40, A $\beta$ 42, in red), which play causative roles in AD pathology through GSK3 $\beta$  activation and tau protein hyperphosphorylation. Mutations in factors involved in APP processing cause familial Alzheimer's disease. On the right, A $\beta$  circRNA-a is synthesised by back-splicing of the APP gene. The open reading frame (ORF) is in blue, with the A $\beta$  sequence in red, the start codon in yellow arrow and the stop codon in black. Translation of A $\beta$  circRNA-a produces A $\beta$ -related peptide (A $\beta$  circRNA-a-DP), which is further processed to form A $\beta$ . The accumulation of A $\beta$  could cause the sequential scenario of GSK3 $\beta$  activation and tau protein hyperphosphorylation, leading to AD pathology. Since no mutations are required for A $\beta$  circRNA biogenesis, this process may depend on intracellular environments rather than genetics. Changes in A $\beta$  circRNA expression and translation may cause sporadic Alzheimer's disease.

So far, it is not known that how many percent of A $\beta$  and A $\beta$  related peptides are derived from A $\beta$  circRNAs in aged people and AD patients. The significance of alternative A $\beta$  biogenesis from A $\beta$  circRNA translation in AD pathology remains to be determined.

As an analogy, although A $\beta$  is endogenous expressed in rodent brain, but it is surprising that wildtype mouse and rat neither appears A $\beta$  deposit in old brain nor develops Alzheimer's disease<sup>38-40</sup>. Despite there are three amino acids variations in the N-terminal from human A $\beta$ , endogenous murine A $\beta$  peptides are neurotoxic and have quite similar ability to produce A $\beta$  deposit provided that the murine APP gene harbours FAD mutations<sup>41</sup>. With the discovery of alternative A $\beta$  biogenesis pathway from A $\beta$  circRNA in human, it will be interesting to find out whether mouse express A $\beta$  circRNA or not. Using RT-PCR with divergent primers located at A $\beta$  sequence region, we failed to detect any mouse A $\beta$  circRNA copy (Supplementary Fig. 6). As positive control, a circRNA spanning exon 9 to exon 13 of mouse App gene was detected (Supplementary Fig. 6). Apparently, mouse does not express A $\beta$  circRNA, thus lacking the alternative A $\beta$  biogenesis pathway existed in human, possibly explaining the difference of A $\beta$

deposition in elderly brain between human and mouse. Moreover, it indicates that the A $\beta$  biogenesis from A $\beta$  circRNA translation may play essential role in human AD development.

In this study, the proteolytic processing of A $\beta$  circRNA-a derived peptide is not studied. It will be interesting to investigate how  $\alpha$ ,  $\beta$  and  $\gamma$ -secretase participate in the A $\beta$  biogenesis mechanism from A $\beta$  circRNA-a-DP.

Furthermore, other A $\beta$  circRNA isoforms also trigger further investigations. For example, whether they can also produce A $\beta$  related peptides which can be eventually processed to form A $\beta$ .

In AD pathology, ageing itself is the most causative factor. But the mechanism of how A $\beta$  exceptionally accumulate in old people's brain is still largely unknown. Recent studies have implicated circRNA as a regulator of cellular stress<sup>42</sup>. For example, the translation of Circ-ZNF609 circRNA could be induced by heat shock stress<sup>34</sup>. In brain ageing, neurons are particularly vulnerable to various stresses<sup>43</sup>. Presumably, expression of A $\beta$  circRNAs and its translated peptide could be activated by various (age-related) stresses, and cause a detrimental downstream cascade, leading to neurodegeneration.

The rapidly emerging role of circRNA is apparently serving as a template for protein synthesis. However, it is unknown whether peptides produced from circRNA have any function in organisms. Here, we show that the protein produced from A $\beta$  circRNAs translation may play a critical role in Alzheimer's disease, thus endorsing further function exploration of circRNA, and indicating that proteins translated from other circRNAs may also play essential, biologically significant roles.

The discovery of biological roles for A $\beta$  circRNAs and their translated peptides may not only represent a milestone for the function exploration of circRNA, but also reveals a potential ground-breaking mechanism for causing Alzheimer's disease and opens up new strategies for diagnosis, prevention and treatment of Alzheimer's disease.

### **Acknowledgements**

The authors acknowledge the department of biological mechanisms of ageing led by Linda Partridge for sharing chemicals and instruments. The author also appreciates Gabriella B Lundkvist for reading the manuscript.

### **Author Contributions**

DM designed and conceived the study. DM performed the experiments, analysed the results, prepared the figures and wrote the manuscript. DC and XL participated in some experiments.

### **Conflict of interest.**

None declared.

### **References:**

- 1 De Strooper, B. & Karran, E. The Cellular Phase of Alzheimer's Disease. *Cell* **164**, 603-615, doi:10.1016/j.cell.2015.12.056 (2016).
- 2 Canter, R. G., Penney, J. & Tsai, L. H. The road to restoring neural circuits for the treatment of Alzheimer's disease. *Nature* **539**, 187-196, doi:10.1038/nature20412 (2016).
- 3 Bishop, N. A., Lu, T. & Yankner, B. A. Neural mechanisms of ageing and cognitive decline. *Nature* **464**, 529-535, doi:10.1038/nature08983 (2010).

- 4 Hyman, B. T. *et al.* National Institute on Aging-Alzheimer's Association guidelines for the neuropathologic assessment of Alzheimer's disease. *Alzheimers Dement* **8**, 1-13, doi:10.1016/j.jalz.2011.10.007 (2012).
- 5 Niccoli, T. & Partridge, L. Ageing as a risk factor for disease. *Curr Biol* **22**, R741-752, doi:10.1016/j.cub.2012.07.024 (2012).
- 6 Huang, Y. & Mucke, L. Alzheimer mechanisms and therapeutic strategies. *Cell* **148**, 1204-1222, doi:10.1016/j.cell.2012.02.040 (2012).
- 7 Hardy, J. A. & Higgins, G. A. Alzheimer's disease: the amyloid cascade hypothesis. *Science* **256**, 184-185 (1992).
- 8 Haass, C., Koo, E. H., Mellon, A., Hung, A. Y. & Selkoe, D. J. Targeting of cell-surface beta-amyloid precursor protein to lysosomes: alternative processing into amyloid-bearing fragments. *Nature* **357**, 500-503, doi:10.1038/357500a0 (1992).
- 9 Haass, C. *et al.* Amyloid beta-peptide is produced by cultured cells during normal metabolism. *Nature* **359**, 322-325, doi:10.1038/359322a0 (1992).
- 10 Martin, L. *et al.* Tau protein kinases: involvement in Alzheimer's disease. *Ageing Res Rev* **12**, 289-309, doi:10.1016/j.arr.2012.06.003 (2013).
- 11 Goate, A. *et al.* Segregation of a missense mutation in the amyloid precursor protein gene with familial Alzheimer's disease. *Nature* **349**, 704-706, doi:10.1038/349704a0 (1991).
- 12 Sherrington, R. *et al.* Cloning of a gene bearing missense mutations in early-onset familial Alzheimer's disease. *Nature* **375**, 754-760, doi:10.1038/375754a0 (1995).
- 13 Schellenberg, G. D. *et al.* Genetic linkage evidence for a familial Alzheimer's disease locus on chromosome 14. *Science* **258**, 668-671 (1992).
- 14 Levy-Lahad, E. *et al.* Candidate gene for the chromosome 1 familial Alzheimer's disease locus. *Science* **269**, 973-977 (1995).
- 15 Reitz, C. & Mayeux, R. Alzheimer disease: epidemiology, diagnostic criteria, risk factors and biomarkers. *Biochem Pharmacol* **88**, 640-651, doi:10.1016/j.bcp.2013.12.024 (2014).
- 16 Van Cauwenberghe, C., Van Broeckhoven, C. & Sleegers, K. The genetic landscape of Alzheimer disease: clinical implications and perspectives. *Genet Med* **18**, 421-430, doi:10.1038/gim.2015.117 (2016).
- 17 Mesulam, M. M. Neuroplasticity failure in Alzheimer's disease: bridging the gap between plaques and tangles. *Neuron* **24**, 521-529 (1999).
- 18 Morris, G. P., Clark, I. A. & Vissel, B. Inconsistencies and controversies surrounding the amyloid hypothesis of Alzheimer's disease. *Acta Neuropathol Commun* **2**, 135, doi:10.1186/s40478-014-0135-5 (2014).
- 19 Musiek, E. S. & Holtzman, D. M. Three dimensions of the amyloid hypothesis: time, space and 'wingmen'. *Nat Neurosci* **18**, 800-806, doi:10.1038/nn.4018 (2015).
- 20 O'Brien, R. J. & Wong, P. C. Amyloid precursor protein processing and Alzheimer's disease. *Annu Rev Neurosci* **34**, 185-204, doi:10.1146/annurev-neuro-061010-113613 (2011).
- 21 Chen, L. L. The biogenesis and emerging roles of circular RNAs. *Nat Rev Mol Cell Biol* **17**, 205-211, doi:10.1038/nrm.2015.32 (2016).
- 22 Rybak-Wolf, A. *et al.* Circular RNAs in the Mammalian Brain Are Highly Abundant, Conserved, and Dynamically Expressed. *Mol Cell* **58**, 870-885, doi:10.1016/j.molcel.2015.03.027 (2015).

- 23 Gruner, H., Cortes-Lopez, M., Cooper, D. A., Bauer, M. & Miura, P. CircRNA accumulation in the aging mouse brain. *Sci Rep* **6**, 38907, doi:10.1038/srep38907 (2016).
- 24 Westholm, J. O. *et al.* Genome-wide analysis of drosophila circular RNAs reveals their structural and sequence properties and age-dependent neural accumulation. *Cell Rep* **9**, 1966-1980, doi:10.1016/j.celrep.2014.10.062 (2014).
- 25 Cortes-Lopez, M. *et al.* Global accumulation of circRNAs during aging in *Caenorhabditis elegans*. *BMC Genomics* **19**, 8, doi:10.1186/s12864-017-4386-y (2018).
- 26 Glazar, P., Papavasileiou, P. & Rajewsky, N. circBase: a database for circular RNAs. *RNA* **20**, 1666-1670, doi:10.1261/rna.043687.113 (2014).
- 27 Jeck, W. R. *et al.* Circular RNAs are abundant, conserved, and associated with ALU repeats. *RNA* **19**, 141-157, doi:10.1261/rna.035667.112 (2013).
- 28 Salzman, J., Chen, R. E., Olsen, M. N., Wang, P. L. & Brown, P. O. Cell-type specific features of circular RNA expression. *PLoS Genet* **9**, e1003777, doi:10.1371/journal.pgen.1003777 (2013).
- 29 Mo, D., Raabe, C. A., Reinhardt, R., Brosius, J. & Rozhdestvensky, T. S. Alternative processing as evolutionary mechanism for the origin of novel nonprotein coding RNAs. *Genome Biol Evol* **5**, 2061-2071, doi:10.1093/gbe/evt155 (2013).
- 30 Burnouf, S., Gorsky, M. K., Dols, J., Gronke, S. & Partridge, L. Abeta43 is neurotoxic and primes aggregation of Abeta40 in vivo. *Acta Neuropathol* **130**, 35-47, doi:10.1007/s00401-015-1419-y (2015).
- 31 Shankar, G. M., Welzel, A. T., McDonald, J. M., Selkoe, D. J. & Walsh, D. M. Isolation of low-n amyloid beta-protein oligomers from cultured cells, CSF, and brain. *Methods Mol Biol* **670**, 33-44, doi:10.1007/978-1-60761-744-0\_3 (2011).
- 32 Schlachetzki, J. C., Saliba, S. W. & Oliveira, A. C. Studying neurodegenerative diseases in culture models. *Rev Bras Psiquiatr* **35 Suppl 2**, S92-100, doi:10.1590/1516-4446-2013-1159 (2013).
- 33 Houck, A. L., Hernandez, F. & Avila, J. A Simple Model to Study Tau Pathology. *J Exp Neurosci* **10**, 31-38, doi:10.4137/JEN.S25100 (2016).
- 34 Legnini, I. *et al.* Circ-ZNF609 Is a Circular RNA that Can Be Translated and Functions in Myogenesis. *Mol Cell* **66**, 22-37 e29, doi:10.1016/j.molcel.2017.02.017 (2017).
- 35 Pamudurti, N. R. *et al.* Translation of CircRNAs. *Mol Cell* **66**, 9-21 e27, doi:10.1016/j.molcel.2017.02.021 (2017).
- 36 Yang, Y. *et al.* Extensive translation of circular RNAs driven by N(6)-methyladenosine. *Cell Res* **27**, 626-641, doi:10.1038/cr.2017.31 (2017).
- 37 Tatomer, D. C. & Wilusz, J. E. An Uncharted Journey for Ribosomes: Circumnavigating Circular RNAs to Produce Proteins. *Mol Cell* **66**, 1-2, doi:10.1016/j.molcel.2017.03.011 (2017).
- 38 Shivers, B. D. *et al.* Alzheimer's disease amyloidogenic glycoprotein: expression pattern in rat brain suggests a role in cell contact. *EMBO J* **7**, 1365-1370 (1988).
- 39 Yamada, T. *et al.* Complementary DNA for the mouse homolog of the human amyloid beta protein precursor. *Biochem Biophys Res Commun* **149**, 665-671 (1987).
- 40 Jankowsky, J. L. *et al.* Rodent A beta modulates the solubility and distribution of amyloid deposits in transgenic mice. *J Biol Chem* **282**, 22707-22720, doi:10.1074/jbc.M611050200 (2007).
- 41 Xu, G. *et al.* Murine Abeta over-production produces diffuse and compact Alzheimer-type amyloid deposits. *Acta Neuropathol Commun* **3**, 72, doi:10.1186/s40478-015-0252-9 (2015).

- 42 Fischer, J. W. & Leung, A. K. CircRNAs: a regulator of cellular stress. *Crit Rev Biochem Mol Biol* **52**, 220-233, doi:10.1080/10409238.2016.1276882 (2017).
- 43 Mattson, M. P. & Magnus, T. Ageing and neuronal vulnerability. *Nat Rev Neurosci* **7**, 278-294, doi:10.1038/nrn1886 (2006).

## The role of A $\beta$ circRNA in Alzheimer's disease: alternative mechanism of A $\beta$ biogenesis from A $\beta$ circRNA translation

Dingding Mo <sup>#,\*</sup>, Di Cui<sup>#</sup>, Xinping Li<sup>#</sup>

<sup>#</sup>, Max Planck Institute for Biology of Ageing, Joseph-Stelzmann-Strasse 9b, 50931 Cologne, Germany

<sup>\*</sup>, Corresponding author, [Dingding.Mo@age.mpg.de](mailto:Dingding.Mo@age.mpg.de)

### Supplementary table 1

A $\beta$  circRNA expression plasmid construction oligos

Abeta-circF gtttgtttttcagATGAGCTGCTTCAGAAAGAGCAAACCT

ABeta-circR gcatggattattacCTCCACCACCCATGATGAATGG

circDMO-LF GTCGACTGGATCcaacgtaaccc

DMo-Ab-LR CTGAAGCAGCTCATctgaaaaacaaacagaatacaacctcagc

DMo-Ab-RF GGTGTGGTGGAGgtaataatccatgcaccgtctcacc

circDMO-RR cactttgCTCGAGctcatcaacatg

A $\beta$  circRNA verification oligos

AB-cRNAvF2 GTGATCGTCATCACCTTGGTGATGC

AB-cRNAvR2 CACCATGAGTCCAATGATTGCACC

qPCR oligos

human A $\beta$  circRNA

Abeta-cF GTCATAGCGACAGTGATCGTC

Abeta-cR CTTGGTTCACTAATCATGTTGGC

Human APP mRNA

hAPP-mF TTTGTGATTCCCTACCGCTG

hAPP-mR TGCCAGTGAAGATGAGTTTCG

mouse App mRNA qRT-PCR, only amplify mRNA, not circRNA

App-mF ATCTTCACTGGCACACCG

App-mR GCATACAAACTCTACCCCTCG

mouse putative A $\beta$  circRNA amplification:

F3 Gctgtctctcattggctgctcc

R3 agctttagagacacacatggccag

mouse App mRNA RT-PCR at A $\beta$  peptide region

F1 GGACATGATTCAGGATTTGAAGTCC

R1 CACCAGGGTGATGACAATCACG

mouse putative A $\beta$  circRNA amplification, same sequence region as mAB-mF, mAB-mR

R2 GGACTTCAAATCCTGAATCATGTCC

F2 CGTGATTGTCATCACCCCTGGTG

Mouse Actb mRNA:

mActbF1 ACCTTCTACAATGAGCTGCG,

mActbR1 CTGGATGGCTACGTACATGG

Human ACTB mRNA:

hACTB-F ACCTTCTACAATGAGCTGCG

hACTB-R CCTGGATAGCAACGTACATGG



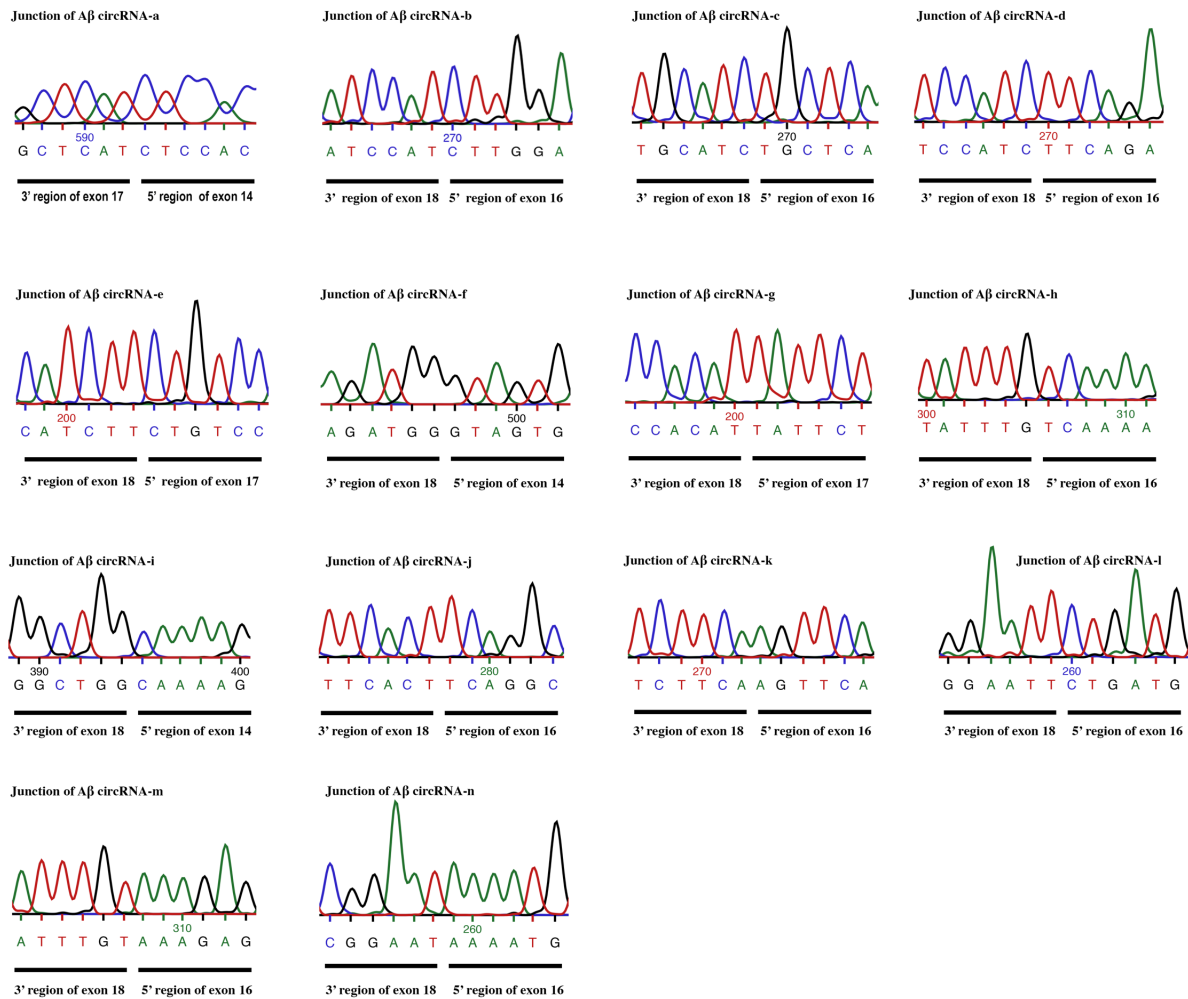

### Supplementary Fig. 1.

#### the junction region sequencing of Aβ circRNA isoforms.

junction site sequencing of Aβ circRNA-a, b, c, d, e, f, g, h, i, j, k, l, m, n.

>Aβ circRNA-a (524 nt)

```
ATGAGCTGCTTCAGAAAGAGCAAACTATTCAGATGACGCTTTGGCCAACATGATTAGTGAACCAAG
GATCAGTTACGGAAACGATGCTCTCATGCCATCTTTGACCGAAACGAAAACCACCGTGGAGCTCCTT
CCCGTGAATGGAGAGTTCAGCCTGGACGATCTCCAGCCGTGGCATTCTTTTGGGGCTGACTCTGTGC
CAGCCAACACAGAAAACGAAGTTGAGCCTGTTGATGCCCCCCTGCTGCCGACCGAGGACTGACCA
CTCGACCAGTTCTGGGTTGACAAATATCAAGACGGAGGAGATCTCTGAAGTGAAGATGGATGCAG
AATTCCGACATGACTCAGGATATGAAGTTCATCATCAAAAATTGGTGTCTTTGCAGAAGATGTGGG
TTCAAACAAAGGTGCAATCATTGGACTCATGGTGGGCGGTGTTGTCATAGCGACAGTGATCGTCATC
ACCTTGGTGATGCTGAAGAAGAAACAGTACACATCCATTCATCATGGTGTGGTGGAG
```

>Aβ circRNA-b (243 nt)

```
ATGGATGCAGAATCCGACATGACTCAGGATATGAAGTTCATCATCAAAAATTGGTGTCTTTGCAG
AAGATGTGGTTCAAACAAAGGTGCAATCATTGGACTCATGGTGGGCGGTGTTGTCATAGCGACAG
TGATCGTCATCACCTTGGTGATGCTGAAGAAGAAACAGTACACATCCATTCATCATGGTGTGGTGG
GGTTGACGCCGCTGTCACCCAGAGGAGCGCCACCTGTCCAAG
```

>A $\beta$  circRNA-c (287 nt)

GATGCAGAATTCCGACATGACTCAGGATATGAAGTTCATCATCAAAAATTGGTGT  
TCTTTGCAGAAGATGTGGGTTCAAACAAAGGTGCAATCATTGGACTCATGGTGGG  
CGGTGTTGTCATAGCGACAGTGATCGTCATCACCTTGGTGATGCTGAAGAAGAAA  
CAGTACACATCCATTCATCATGGTGTGGTGGAGGTTGACGCCGCTGTCACCCAG  
AGGAGCGCCACCTGTCCAAGATGCAGCAGAACGGCTACGAAAATCCAACCTACA  
AGTTCTTTGAGCA

>A $\beta$  circRNA-d (328 nt)

GATGGATGCAGAATTCCGACATGACTCAGGATATGAAGTTCATCATCAAAAATTG  
GTGTTCTTTGCAGAAGATGTGGGTTCAAACAAAGGTGCAATCATTGGACTCATGG  
TGGGCGGTGTTGTCATAGCGACAGTGATCGTCATCACCTTGGTGATGCTGAAGAA  
GAAACAGTACACATCCATTCATCATGGTGTGGTGGAGGTTGACGCCGCTGTCACC  
CCAGAGGAGCGCCACCTGTCCAAGATGCAGCAGAACGGCTACGAAAATCCAACC  
TACAAGTTCTTTGAGCAGATGCAGAACTAGACCCCGCCACAGCAGCCTCTGAA

>A $\beta$  circRNA-e (269 nt)

AAGATGTGGGTTCAAACAAAGGTGCAATCATTGGACTCATGGTGGGCGGTGTTGT  
CATAGCGACAGTGATCGTCATCACCTTGGTGATGCTGAAGAAGAAACAGTACAC  
ATCCATTCATCATGGTGTGGTGGAGGTTGACGCCGCTGTCACCCAGAGGAGCGC  
CACCTGTCCAAGATGCAGCAGAACGGCTACGAAAATCCAACCTACAAGTTCTTTG  
AGCAGATGCAGAACTAGACCCCGCCACAGCAGCCTCTGAAGTTGGACAG

>A $\beta$  circRNA-f (584 nt)

CCATCTTTGACCGAAACGAAAACCACCGTGGAGCTCCTTCCCGTGAATGGAGAGT  
TCAGCCTGGACGATCTCCAGCCGTGGCATTCTTTTGGGGCTGACTCTGTGCCAGC  
CAACACAGAAAACGAAGTTGAGCCTGTTGATGCCCGCCCTGCTGCCGACCGAGG  
ACTGACCACTCGACCAGGTTCTGGGTTGACAAATATCAAGACGGAGGAGATCTCT  
GAAGTGAAGATGGATGCAGAATTCCGACATGACTCAGGATATGAAGTTCATCAT  
CAAAAATTGGTGTCTTTGCAGAAGATGTGGGTTCAAACAAAGGTGCAATCATTG  
GACTCATGGTGGGCGGTGTTGTCATAGCGACAGTGATCGTCATCACCTTGGTGAT  
GCTGAAGAAGAAACAGTACACATCCATTCATCATGGTGTGGTGGAGGTTGACGC  
CGCTGTCACCCAGAGGAGCGCCACCTGTCCAAGATGCAGCAGAACGGCTACGA  
AAATCCAACCTACAAGTTCTTTGAGCAGATGCAGAACTAGACCCCGCCACAGCA  
GCCTCTGAAGTTGGACAGCAAACCATTGCTTCACTAC

>A $\beta$  circRNA-g (310 nt)

ATGTGGGTTCAAACAAAGGTGCAATCATTGGACTCATGGTGGGCGGTGTTGTCAT  
AGCGACAGTGATCGTCATCACCTTGGTGATGCTGAAGAAGAAACAGTACACATC  
CATTTCATCATGGTGTGGTGGAGGTTGACGCCGCTGTCACCCAGAGGAGCGCCAC  
CTGTCCAAGATGCAGCAGAACGGCTACGAAAATCCAACCTACAAGTTCTTTGAGC  
AGATGCAGAACTAGACCCCGCCACAGCAGCCTCTGAAGTTGGACAGCAAACC  
ATTGCTTCACTACCCATCGGTGTCCATTTATAGAATA

>A $\beta$  circRNA-h (466 nt)

CAAATATCAAGACGGAGGAGATCTCTGAAGTGAAGATGGATGCAGAATTCCGAC  
ATGACTCAGGATATGAAGTTCATCATCAAAAATTGGTGTCTTTGCAGAAGATGT  
GGGTTCAAACAAAGGTGCAATCATTGGACTCATGGTGGGCGGTGTTGTCATAGCG  
ACAGTGATCGTCATCACCTTGGTGATGCTGAAGAAGAAACAGTACACATCCATTC  
ATCATGGTGTGGTGGAGGTTGACGCCGCTGTCACCCAGAGGAGCGCCACCTGTC  
CAAGATGCAGCAGAACGGCTACGAAAATCCAACCTACAAGTTCTTTGAGCAGAT

GCAGAACTAGACCCCCGCCACAGCAGCCTCTGAAGTTGGACAGCAAACCATTG  
CTTCACTACCCATCGGTGTCCATTTATAGAATAATGTGGGAAGAAACAAACCCGT  
TTTATGATTTACTCATTATCGCCTTTTGA

>A $\beta$  circRNA-i (553 nt)

CCAGCCAACACAGAAAACGAAGTTGAGCCTGTTGATGCCCCGCCCTGCTGCCGACC  
GAGGACTGACCACTCGACCAGGTTCTGGGTTGACAAATATCAAGACGGAGGAGA  
TCTCTGAAGTGAAGATGGATGCAGAATTCCGACATGACTCAGGATATGAAGTTCA  
TCATCAAAAATTGGTGTTCCTTTGCAGAAGATGTGGGTTCAAACAAAGGTGCAATC  
ATTGGACTCATGGTGGGCGGTGTTGTCATAGCGACAGTGATCGTCATCACCTTGG  
TGATGCTGAAGAAGAAACAGTACACATCCATTCATCATGGTGTGGTGGAGGTTGA  
CGCCGCTGTCACCCAGAGGAGCGCCACCTGTCCAAGATGCAGCAGAACGGCTA  
CGAAAATCCAACCTACAAGTTCTTTGAGCAGATGCAGAACTAGACCCCCGCCACA  
GCAGCCTCTGAAGTTGGACAGCAAACCATTGCTTCACTACCCATCGGTGTCCAT  
TTATAGAATAATGTGGGAAGAAACAAACCCGTTTTATGATTTACTCATTATCGCC  
TTTTG

>A $\beta$  circRNA-j (469 nt)

AGTGAAGATGGATGCAGAATTCCGACATGACTCAGGATATGAAGTTCATCATCA  
AAAATTGGTGTTCCTTTGCAGAAGATGTGGGTTCAAACAAAGGTGCAATCATTGGA  
CTCATGGTGGGCGGTGTTGTCATAGCGACAGTGATCGTCATCACCTTGGTGTATGC  
TGAAGAAGAAACAGTACACATCCATTCATCATGGTGTGGTGGAGGTTGACGCCG  
CTGTCACCCAGAGGAGCGCCACCTGTCCAAGATGCAGCAGAACGGCTACGAAA  
ATCCAACCTACAAGTTCTTTGAGCAGATGCAGAACTAGACCCCCGCCACAGCAGC  
CTCTGAAGTTGGACAGCAAACCATTGCTTCACTACCCATCGGTGTCCATTTATA  
GAATAATGTGGGAAGAAACAAACCCGTTTTATGATTTACTCATTATCGCCTTTTGA  
ACAGCTGTGCTGTAACACAAGTAGATGCCTGA

>A $\beta$  circRNA-k (470 nt)

TGAAGATGGATGCAGAATTCCGACATGACTCAGGATATGAAGTTCATCATCAAA  
AATTGGTGTTCCTTTGCAGAAGATGTGGGTTCAAACAAAGGTGCAATCATTGGACT  
CATGGTGGGCGGTGTTGTCATAGCGACAGTGATCGTCATCACCTTGGTGTATGCTG  
AAGAAGAAACAGTACACATCCATTCATCATGGTGTGGTGGAGGTTGACGCCGCT  
GTCACCCAGAGGAGCGCCACCTGTCCAAGATGCAGCAGAACGGCTACGAAAAT  
CCAACCTACAAGTTCTTTGAGCAGATGCAGAACTAGACCCCCGCCACAGCAGCCT  
CTGAAGTTGGACAGCAAACCATTGCTTCACTACCCATCGGTGTCCATTTATAGA  
ATAATGTGGGAAGAAACAAACCCGTTTTATGATTTACTCATTATCGCCTTTTGA  
GCTGTGCTGTAACACAAGTAGATGCCTGAACT

>A $\beta$  circRNA-l (475 nt)

AATCCGACATGACTCAGGATATGAAGTTCATCATCAAAAATTGGTGTTCCTTTGC  
AGAAGATGTGGGTTCAAACAAAGGTGCAATCATTGGACTCATGGTGGGCGGTGTT  
GTCATAGCGACAGTGATCGTCATCACCTTGGTGTATGCTGAAGAAGAAACAGTAC  
ACATCCATTCATCATGGTGTGGTGGAGGTTGACGCCGCTGTCACCCAGAGGAGC  
GCCACCTGTCCAAGATGCAGCAGAACGGCTACGAAAATCCAACCTACAAGTTCTT  
TGAGCAGATGCAGAACTAGACCCCCGCCACAGCAGCCTCTGAAGTTGGACAGCA  
AAACCATTGCTTCACTACCCATCGGTGTCCATTTATAGAATAATGTGGGAAGAAA  
CAAACCCGTTTTATGATTTACTCATTATCGCCTTTTGAAGCTGTGCTGTAACACA  
AGTAGATGCCTGAACTTGAATTAATCCACACATCAG

>A $\beta$  circRNA-m (542 nt)

ACAAATATCAAGACGGAGGAGATCTCTGAAGTGAAGATGGATGCAGAATTCCGACATGACTCAGGATATGAAGTTCATCATCAAAAATTGGTGTTCCTTTGCAGAAGATGTGGGTTCAAACAAAGGTGCAATCATTGGACTCATGGTGGGCGGTGTTGTCATAGCGACAGTGATCGTCATCACCTTGGTGTGCTGAAGAAGAAACAGTACACATCCATTATCATGGTGTGGTGGAGGTTGACGCCGCTGTCACCCCAGAGGAGCGCCACCTGTCCAAGATGCAGCAGAACGGCTACGAAAATCCAACCTACAAGTTCTTTGAGCAGATGCAGAACTAGACCCCCGCCACAGCAGCCTCTGAAGTTGGACAGCAAAACCATTGCTTCACTACCCATCGGTGTCCATTTATAGAATAATGTGGGAAGAAACAAACCCGTTTTATGATTTACTCATTATCGCCTTTTGACAGCTGTGCTGTAACACAAGTAGATGCCTGAACTTGAATTAATCCACACATCAGTAATGTATTCTATCTCTCTTT

>A $\beta$  circRNA-n (502 nt)

ATCCGACATGACTCAGGATATGAAGTTCATCATCAAAAATTGGTGTTCCTTTGCAAGATGTGGGTTCAAACAAAGGTGCAATCATTGGACTCATGGTGGGCGGTGTTGTCATAGCGACAGTGATCGTCATCACCTTGGTGTGCTGAAGAAGAAACAGTACACATCCATTCATCATGGTGTGGTGGAGGTTGACGCCGCTGTCACCCCAGAGGAGCGCCACCTGTCCAAGATGCAGCAGAACGGCTACGAAAATCCAACCTACAAGTTCTTTGAGCAGATGCAGAACTAGACCCCCGCCACAGCAGCCTCTGAAGTTGGACAGCAAAACCATTGCTTCACTACCCATCGGTGTCCATTTATAGAATAATGTGGGAAGAAACAACCCGTTTTATGATTTACTCATTATCGCCTTTTGACAGCTGTGCTGTAACACAAGTAGATGCCTGAACTTGAATTAATCCACACATCAGTAATGTATTCTATCTCTCTTTACATTTT

>A $\beta$ 42

GATGCAGAATTCCGACATGACTCAGGATATGAAGTTCATCATCAAAAATTGGTGTTCCTTTGCAGAAGATGTGGGTTCAAACAAAGGTGCAATCATTGGACTCATGGTGGGCGGTGTTGTCATAGCG

### Supplementary sequencing data

The sequences of A $\beta$  circRNA a, b, c, d, e, f, g, h, i, j, k, l, m, n

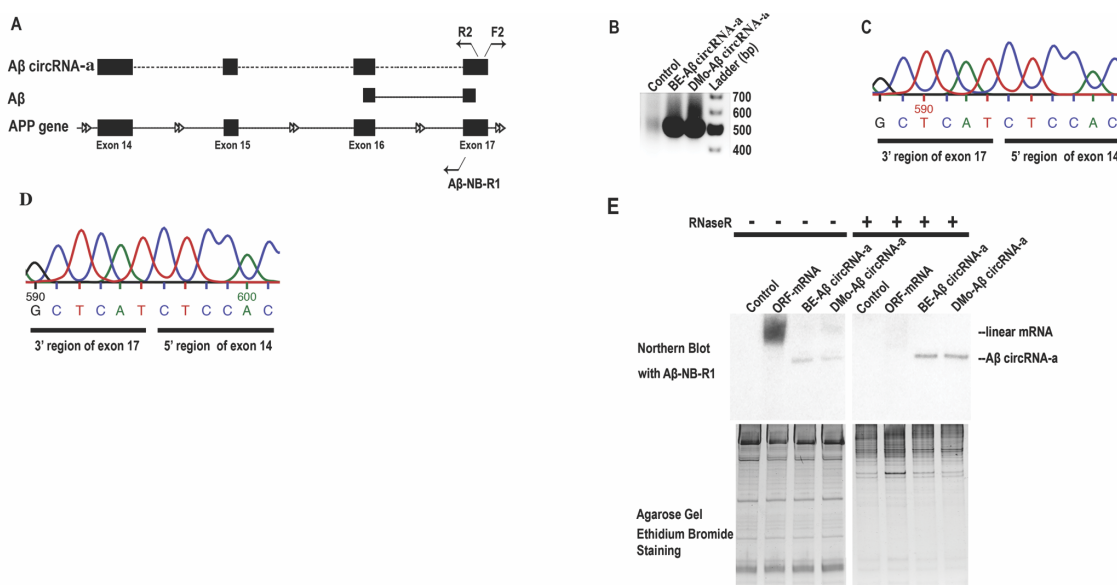

**Supplementary Fig. 2. RT-PCR and northern blot verification of A $\beta$  circRNA-a expression in HEK293 cells.**

A) RT-PCR primers sites in A $\beta$  circRNA. B) Agarose gel electrophoresis of RT-PCR products (503 bp) using primers A $\beta$ -VR2 and A $\beta$ -VF2; BE-A $\beta$  circRNA-a, pCircRNA-BE-A $\beta$ -a transfected HEK293 cells; DMO-A $\beta$  circRNA-a, pCircRNA-DMo-A $\beta$ -a transfected HEK293 cells. RT-PCR products were cloned, sequenced and aligned, confirming that A $\beta$  circRNA-a were identical and comprised exons 14, 15, 16 and 17 of the APP gene without introns (data not shown); C, D) the sequencing of A $\beta$  circRNA-a junction region of back-splicing from pCircRNA-BE-A $\beta$ -a and pCircRNA-DMo-A $\beta$ -a; E) Northern blot analysis of A $\beta$  circRNA-a expression in HEK293 cells; ORF-mRNA, the linear cognate ORF mRNA of A $\beta$  circRNA-a. For RNase R treatment, 15  $\mu$ g total RNA was digested with 10 unites of RNase R for 1 hour at 37 °C; -, no treatment; +, with treatment; Oligo A $\beta$ -NB-R1 (CCCACCATGAGTCCAATGATTGCACCTTTGTTTGAACCCACATCTTCTGCAAAGA ACACC) was used in northern blot; ethidium bromide staining of the agarose gel was used as loading control.

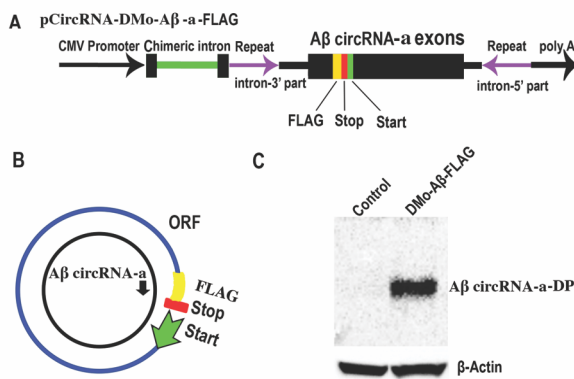

### Supplementary Fig. 3. Fig. FLAG tagged A $\beta$ circRNA-a derived peptide expression in HEK293 cells.

A) schematic of FLAG tagged A $\beta$  circRNA-a expression plasmid. B) schematic of FLAG tagged A $\beta$  circRNA-a. C) Control, pCircRNA-DMo empty vector; DMO-A $\beta$ -FLAG, pCircRNA-DMo-A $\beta$ -a-FLAG.  $\beta$ -Actin was used as loading control.

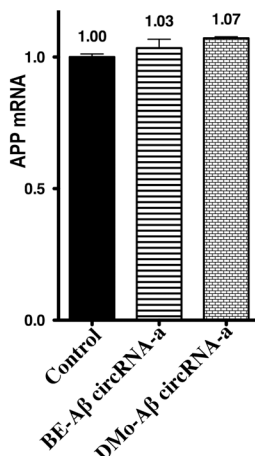

### Supplementary Fig. 4. Endogenous APP mRNA expression in HEK293 cells overexpressing A $\beta$ circRNA-a.

qRT-PCR analysis of endogenous APP mRNA expression in A $\beta$  circRNA-a overexpressing HEK293 cells. Primers targeted exons 3 and 4, which are not contained in A $\beta$  circRNA-a: hAPP-m, TTTGTGATTCCTACCGCTG and hAPP-mR, TGCCAGTGAAGATGAGTTTCG. Control, pCircRNA-DMo empty vector; BE-A $\beta$  CircRNA-a, pCircRNA-BE-A $\beta$ -CircRNA-a; DMo-A $\beta$  CircRNA-a, pCircRNA-DMo-A $\beta$  CircRNA-a. No significant differences between different groups were observed. n = 4.

```

> A $\beta$  circRNA-a-DP
1
miseprisyndalmpsltetkttvellpvngefslddlqpwhsfgadsv 50
51
pantenevepvdarpaadrglttrpgsgltnikteisevkm $\beta$ daefrhds 100
101
gyevhhqklvffaedvgsnkgaiiglmvggvvia $\alpha$ tvivitlvmlkkkqyt 150
151
sihhgvveMSCFRKSKTIQMTSWPT 175
Transmembrane domain

```

### Supplementary Fig. 5. The putative amino acid sequence of A $\beta$ circRNA-a-DP.

Predicted from the identical sequences of all circRNA RT-PCR products: red, sequence of A $\beta$ 42; blue, the unique sequence of A $\beta$  circRNA-a-DP resulting from the circular translation of A $\beta$  circRNA, which is not present in the APP full-length protein. The calculated molecular weight of A $\beta$  circRNA-a-DP is 19.2 kDa; the arrow indicates the possible secretase sites.

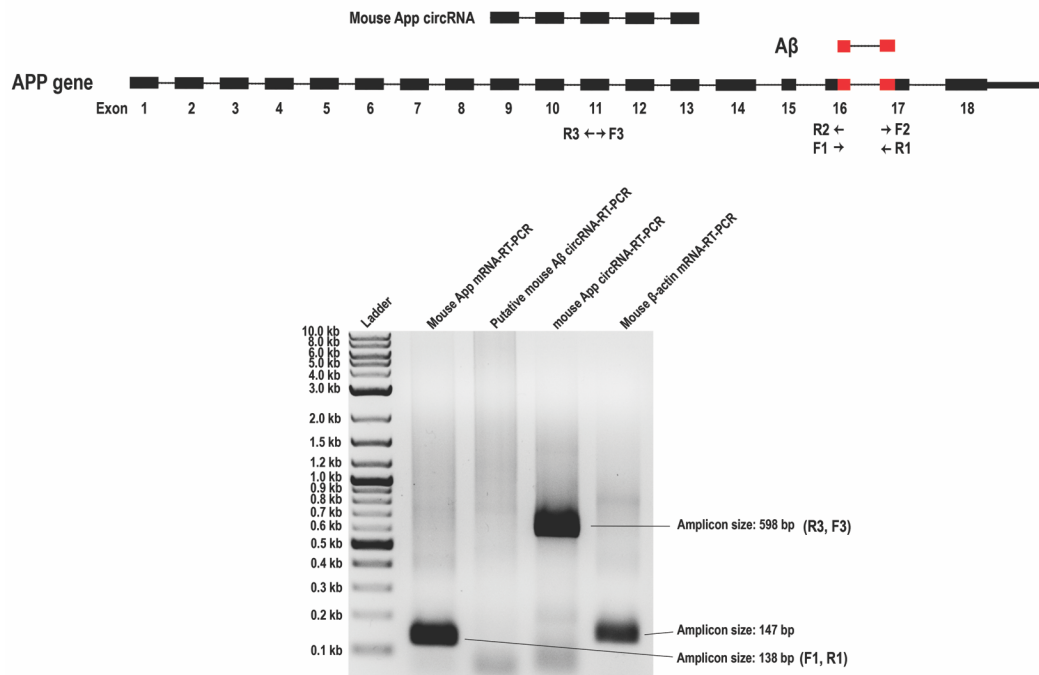

### Supplementary Fig. 6. Mouse brain does not express A $\beta$ circRNA copies.

Primers F1 and R1 were used to amplify App mRNA; the divergent primers R2 and F2 located at the same position as F1 and R1 were used to amplify putative A $\beta$  circRNA copies; R3 and F3 were used to amplify the App circRNA (exon 9 to exon 13) as positive control circRNA RT-PCR; amplicon from mouse  $\beta$ -actin mRNA was also used as RT-PCR positive control.
